# Supplementary material for: Acute Increase in Blood αCGRP at Maximal Exercise and Its Association to Cardiorespiratory Fitness, Carbohydrate Oxidation and Work Performed: An Exploratory Study in Young Men
Source: MDPI journal article supplement (doi:10.3390/biology10080783), 2021-08-17
Supplement: s1 [file s1]

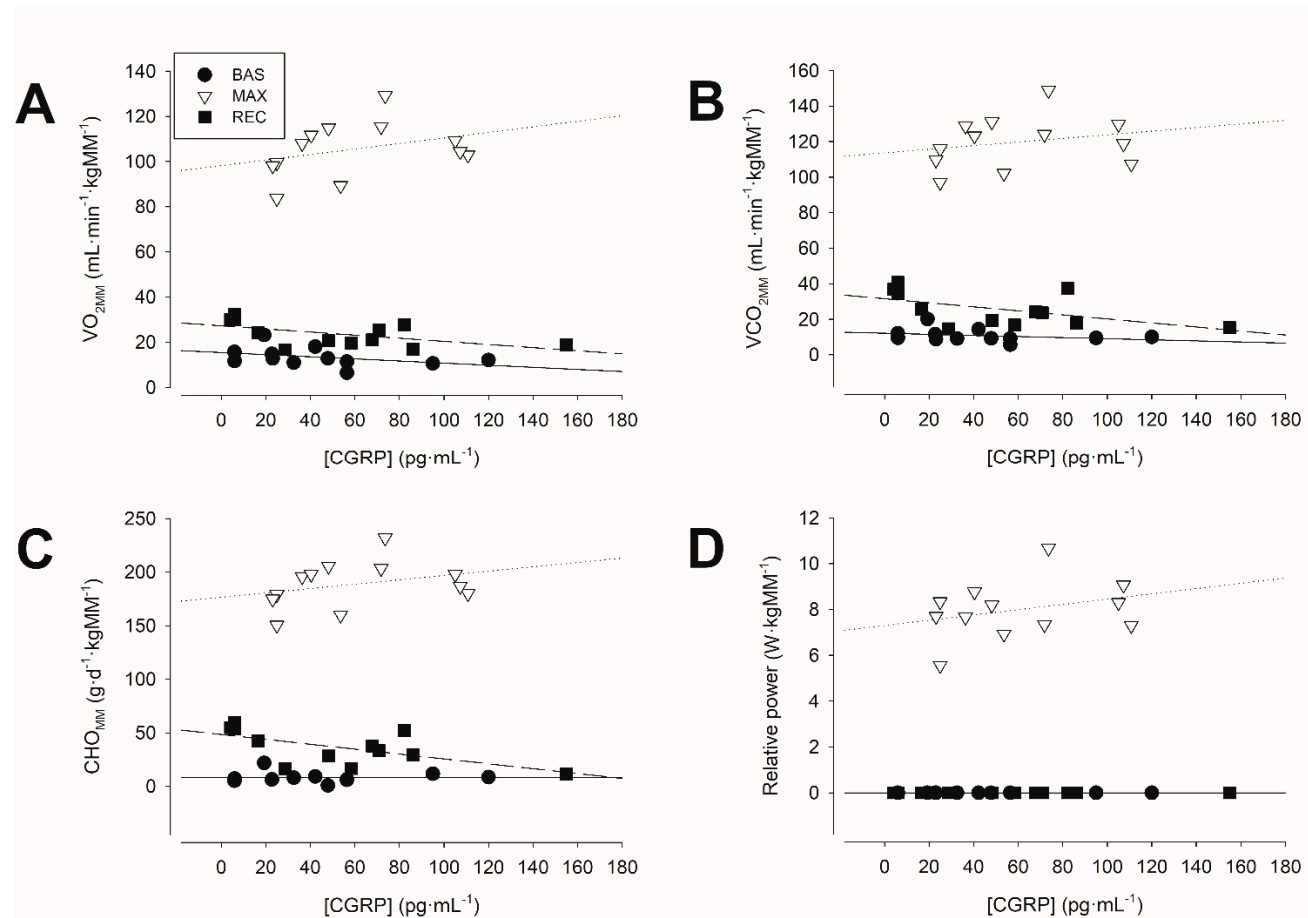

**Figure S1.** Correlation between  $\alpha$ CGRP and  $\text{VO}_2$ ,  $\text{VCO}_2$ , carbohydrate oxidation (CHO) and relative power normalized to muscle mass. Overall,  $\alpha$ CGRP tended to correlate with these parameters only at maximal effort (MAX). **A.** Correlation of  $\alpha$ CGRP and  $\text{VO}_{2\text{MM}}$  (at MAX:  $r=0.332$ ,  $p=0.291$ ); **B.** Correlation of  $\alpha$ CGRP with  $\text{VCO}_{2\text{MM}}$  (at MAX:  $r=0.234$ ,  $p=0.464$ ); **C.** Correlation of  $\alpha$ CGRP with carbohydrate oxidation (at MAX:  $r=0.308$ ,  $p=0.329$ ); **D.** Correlation of  $\alpha$ CGRP with relative power (at MAX:  $r=0.304$ ,  $p=0.336$ ). Data corresponding to baseline are indicated by black circles and continuous lines; data corresponding to maximal effort, by open triangles and dotted lines, and data corresponding to the recovery by black squares and dashed lines.  $n = 12$  for each condition in each panel; Pearson's correlation.
